1       **The clone wars: the Japanese knotweed (*Fallopia japonica*) vs the black vine weevil**  
2                   **(*Otiorhynchus sulcatus*) – characterization of a potential herbivory.**

3                   Loic Teulier\*, Sara Puijalon, Christelle Boisselet and Florence Piola\*

4

5       Univ Lyon, Université Claude Bernard Lyon 1, CNRS, ENTPE, UMR 5023 LEHNA, F-  
6       69622, Villeurbanne, France

7       \*Correspondence: Loic TEULIER ([loic.teulier@univ-lyon1.fr](mailto:loic.teulier@univ-lyon1.fr)) and Florence Piola  
8       ([florence.piola@univ-lyon1.fr](mailto:florence.piola@univ-lyon1.fr))

9

10       **Abstract**

11               The Japanese knotweed (*Fallopia japonica*) is considered as highly invasive in Europe  
12       and is largely widespread in France, without any established predator. This short study first  
13       characterized the herbivory of *Fallopia* by the black vine weevil (*Otiorhynchus sulcatus*), a  
14       commonly encountered coleopteran in France. Through an experimental design of leaf choices,  
15       between *Fragaria* spp. and *Fallopia* spp., our results show that the insects prefer *Fallopia*, even  
16       if it is presented for the first time. Even if this simple observation may appear as trivial, it  
17       highlights a novel plant-insect interaction and may start new insight in plant control or invasion  
18       management.

19

20       **Keywords**

21       Knotweed, black vine weevil, biological invasion, herbivory

22       **Declarations**

23       This study was supported by the recurrent funding of the Claude Bernard University Lyon1  
24       attributed to LT and FP. The authors declare no conflict of interest. LT and FP designed the  
25       experimental protocol. SP and CB performed the experiments. All of the authors participated  
26       to draft and review the manuscript.

27

28

## 29 Introduction

30 Japanese knotweed [*Fallopia japonica* (Houtt.) Ronse Decraene var. *japonica*,  
31 Polygonaceae, hereafter *F. japonica*] is native to Japan and Eastern Asia (Barney et al. 2006).  
32 It was introduced into Europe in the 19th century by Phillipe von Siebold (Bailey and Conolly  
33 2000) and is now widespread in North America and Europe (Bailey et al. 2009; Rouifed et al.  
34 2014; Gippet et al. 2018). This species is a vigorous herbaceous perennial and to date, in  
35 Western Europe (i.e. Germany, Switzerland, United Kingdom, Belgium and France), only a  
36 single octoploid female (male-sterile) clone has been reported (Buhk and Thielsch 2015;  
37 Hollingsworth and Bailey 2000; Krebs et al. 2010; Tiébré et al. 2007).

38 In its country of origin, *Fallopia japonica* is eaten by some specific insects, such as the  
39 Japanese beetle, *Popillia japonica* (Kawano et al. 1999) or the Japanese Knotweed psyllid,  
40 *Aphalara itadori* (Shaw et al. 2009). As the former was identified as a crop pest in North  
41 America, the latter is currently experimented as a potential biocontrol agent in UK. Other  
42 candidates, such as the Common Amber snail, in Slovenia, tried to be identified as native  
43 biological agent to control the widespread of *Fallopia* spp. (Laznik and Trdan, 2017). And  
44 despite a high interest for controlling this invasive plant species (Cottet et al. 2015), to our  
45 knowledge, there is still a lack of identified enemy of the Japanese knotweed in France. (Maurel  
46 et al. 2013). However, we have fortuitously observed an important herbivory of *Fallopia*  
47 *japonica* by the coleopteran *Otiorhynchus sulcatus* (Curculionidae) during a greenhouse  
48 experiment.

49 The black vine weevil (*Otiorhynchus sulcatus*, Fig.1) is an exclusively parthenogenic  
50 coleopteran, meaning that adult weevils represent a single female clone (Smith, 1932; Son and  
51 Lewis 2005). This insect is widely dispersed all over the temperate regions and commonly  
52 encountered in Europe (Moorhouse et al. 1992). It is considered as a major pest of horticultural  
53 crops (Moorhouse et al. 1992) and Smith (1932) described more than 75 plant species, with  
54 observed herbivory in the USA. This high diversity of plant fed may lead to suppose that *O.*  
55 *sulcatus* could be a great predator for *F. japonica*.

56 To our knowledge, no direct field observation of herbivory of *O. sulcatus* on *F. japonica*  
57 were detected in France. And the lack of field description may be due to different parameters.  
58 *O. sulcatus* are indeed nocturnal, and field observation are obviously carried during the day.  
59 Another explanation could come from the low level of *O. sulcatus* population, because of the  
60 number of natural enemies (Moorhouse et al. 1992).

61 However, through an experimental protocol using *Fallopia* spp., herbivory of *O. sulcatus*  
62 was incidentally discovered. Japanese knotweed leaves were eaten, whereas other plants species  
63 present in the greenhouse stayed intact (personal observations). In order to characterize the  
64 origin of this potential herbivory, we found *O. sulcatus* larvae and some adults in each pot of  
65 *Fallopia*. We designed an experimental protocol to strengthen and validate this fortuitous  
66 finding. The goal of this study was therefore to characterize for the first time, the potential  
67 herbivory of *F. japonica* by a native coleopteran, *O. sulcatus* through two main questions:

- 68 a) Are *F. japonica* really eaten by *O. sulcatus*? Our hypothesis is that even if the insects  
69 were fed exclusively with *Fragaria*, they will prefer *F. japonica* when facing a 2-species  
70 choice. # Experiment 1 (“One night, one choice”)  
71 b) If our latest hypothesis seems supported, are the insects only taste *F. japonica* because  
72 it is new and they met the opportunity? Our hypothesis is that *O. sulcatus* will eat the  
73 Japanese knotweed until the end. # Experiment 2 (“Until the End”)  
74

## 75 **Material and methods**

76 Insects, plants and assays were in the same conditions of climate room, at 23°C, 45-65%  
77 RH and a 12hr photoperiod / 24h.

### 78 *Insects*

79 Two populations of *Otiorhynchus sulcatus* larvae were collected close to Lyon area in  
80 winter. The first population was collected in “la Doua” campus (Villeurbanne, France) in  
81 *Fallopia* pots, which is considered as the “F-Pop”. The second population of *Otiorhynchus* was  
82 collected in a horticultural nursery (Vienne, France) without *Fallopia* spp. It therefore  
83 constitutes the naive control population, called “N-Pop”. Both of these populations were reared  
84 to adults in climate room at 23°C, 45-65% RH and a 12hr photoperiod / 24hr. Weevil larvae  
85 were maintained on Strawberry plants (*Fragaria* spp.) in 1.3 L pots shut in vivarium or *F.*  
86 *japonica* until metamorphosis in adult (see Fisher and Bruck 2004).

### 87 *Plants*

88 Rhizomes of *F. japonica* were collected from a single stand in Loire and stored at 4°C.  
89 Rhizome fragments were cut and selected with one node and a biomass of 1.5± 0.1 g. They  
90 were planted in FAVORIT® peat soil and stored in a climate room (photoperiod = 16 hr light,

91 8 hr dark; temperature = 24°C) at Lyon University) until the plants have 7/8 expanded leaves  
92 for the 1<sup>st</sup> assay and 5 expanded leaves for the 2d assay.

93 *Fragaria* spp. came from commercial plants.

#### 94 *Experimental protocol*

95 We decided to study only insect adult stage for focusing on the dramatic consequences on  
96 aerial herbivory in plants.

97 1- “One night, one choice”: insects from N-Pop (n=18) and F-pop (n=5) were randomly  
98 and individually placed in a Petri dish (diameter: 14.5 cm) filled with moist potting soil, in  
99 presence of one leaf piece of two plant species (*F. japonica* or *Fragaria*), following an  
100 experimental protocol adapted from Van Tol et al. 2004. Each leaf was previously cut into small  
101 rectangles of same size and scanned to obtain the initial area. 24h later, leaf area was measured  
102 and the difference between initial area and final area corresponded to the area eaten by the  
103 insects. As a control, for each day of experiment, a Petri dish with the two pieces of leaf without  
104 insect was placed in the same conditions.

105 2- “Until the end”: 15 adult black vine weevils from N-pop were randomly split into 5 2L-  
106 glass jars closed with plastic mesh, in presence of a plant of *F. japonica* (5 leafs each). Each  
107 day, pictures were taken to constitute a time-lapsed evolution of herbivory. The experiment  
108 ended when all the leaves were eaten.

#### 109 **Results and Discussion**

110 *Fallopia* is attractive, even for naive herbivores. *Fallopia*-rearing (F-pop) but also naive (N-  
111 pop) insects were able to eat both of the plant species (Fig. 2, Table 1). Indeed, insects have  
112 eaten a significant leaf area during the night of experiment (between 0.99 and 1.70 cm<sup>2</sup>/night).  
113 F-pop *O.sulcatus* ate a higher percentage of *Fallopia* than *Fragaria* (80% vs. 20%,  
114 respectively). N-pop weevils behaviour was dependent on what they ate before the experiment.  
115 Their choice seems to be driven by the novelty and therefore the attractiveness between  
116 *Fragaria* and *Fallopia* appears more balanced than for F-pop insects. N-pop insects reared on  
117 *Fragaria* were also more attracted by *Fallopia* than *Fragaria*, and on the opposite, N-pop  
118 weevils reared on *Fallopia* ate more *Fragaria* than *Fallopia* leaves (67.7% vs. 32.3%).  
119 Moreover, on the whole sampling size of 41 tests, 10 weevils ate *Fallopia* only, whereas only  
120 2 ate *Fragaria* only. The 29 others tried both of the plants, which supposed that for a major part  
121 of them, it is not a randomized choice.

122 Not only a test. One may argue that Black wine weevils, which preferred *Fallopia* in the former  
123 experiment, only tasted the Japanese knotweed, but would not like it. This hypothesis seems  
124 unlikely, because of the presence of weevil larvae and the obvious herbivory of adults  
125 exclusively in the *Fallopia*'s pots, even if there was a lot of other plants available in our  
126 experimental greenhouse. To confirm the hypothesis that *Fallopia* spp. are sufficiently  
127 appetent, Black wine weevils ate the whole plant in ~25days, until no leaf left (Fig. 3).

128

## 129 **Conclusion and perspectives**

130 For the first time, our results clearly show a massive herbivory of the invasive Japanese  
131 knotweed in France by an insect: *Otiorhynchus sulcatus*. According to the enemy release  
132 hypothesis (Keane and Crawley 2002), introduced species can experience less selective  
133 pressures from natural enemies. Indeed, *Fallopia* has very little herbivory (Ness et al. 2013;  
134 Gippet et al. 2018) while in its native zone, *F. japonica* is heavily impacted by herbivores  
135 (Kawano et al. 1999). Nevertheless, it is possible to envisage an evolution in the territory of  
136 invasion leading to the adaptation of native herbivores to the *Fallopia* taxon.

137 The black vine weevil, *O. sulcatus* is a polyphagous insect that is a noxious pest of field and is  
138 cited as one of the most important species afflicting crops globally throughout the United States,  
139 western Canada, and northern Europe (Moorhouse et al. 1992). Even if this simple observation  
140 may appear as trivial, it highlights a novel plant-insect interaction and may start new insight in  
141 plant control or invasion management. Indeed, depending on the point of view, this interaction  
142 could be considered as a serious asset for biological control of the Japanese knotweed through  
143 the herbivory of a native insect, contrary to other insects specifically introduced, such as  
144 *Gallerucida bifasciata* (Wang et al., 2010a) or *Euops chinensis* (Wang et al. 2010b), which failed  
145 to be efficient only on this target. It could be also considered as a starting point of a pest control  
146 method, using *Fallopia* as a trap plant in greenhouse to catch black wine weevils. These latter  
147 points need further investigations for their validation.

## 148 **Acknowledgments**

149 We are grateful to the reviewers for their further comments on our manuscript. We would like  
150 to thank Tatiana Buisson and Rémi Bernard for their help during the experiments. We thank  
151 Franck Poly (Sempervivum et Cie nursery) for providing us *O. sulcatus* and Bernard  
152 Kaufmann for the insect identification.

153

154 **Bibliography**

155 Bailey JP, Conolly AP (2000) Prize-winners to pariahs: a history of Japanese knotweed sl  
156 (*Polygonaceae*) in the British Isles. *Watsonia* 23: 93-110.

157 Bailey JP, Bimova K, Mandak B. (2009) Asexual spread versus sexual reproduction and  
158 evolution in Japanese Knotweed s.l. sets the stage for the “Battle of the Clones”. *Biol Invasions*  
159 11:1189–1203.

160 Barney JN, Tharayil N, DiTommaso A, Bhowmik PC (2006) The biology of invasive alien  
161 plants in Canada. 5. *Polygonum cuspidatum* Sieb. & Zucc.[= *Fallopia japonica* (Houtt.) Ronse  
162 Decr.]. *Can J Plant Sci* 86(3): 887-906.

163 Buhk, C., & Thielsch, A. (2015). Hybridisation boosts the invasion of an alien species complex:  
164 Insights into future invasiveness. *Perspectives in Plant Ecol Evol Syst*, 17(4), 274–283.

165 Cottet, M., Piola, F., Le Lay, Y. F., Rouifed, S., & Riviere-Honegger, A. (2015). How  
166 environmental managers perceive and approach the issue of invasive species: the case of  
167 Japanese knotweed s. l.(Rhône River, France). *Biological invasions*, 17(12), 3433-3453.

168 Fisher JR, Bruck DJ (2004) A technique for continuous mass rearing of the black vine  
169 weevil, *Otiorhynchus sulcatus*. *Entomol Exp Appl* 113(1): 73-75.

170 Gippet J, Piola F, Rouifed S, Viricel MR, Puijalon S, Douady CJ, Kaufmann B (2018) Multiple  
171 invasions in urbanized landscapes: Invasive garden ants acquire resources from Japanese  
172 knotweeds without affecting herbivory rates. *Arthropod Plant Interact* 12: 351–360.

173 Hollingsworth ML, Bailey J P (2000). Evidence for massive clonal growth in the invasive weed  
174 *Fallopia japonica* (Japanese Knotweed). *Bot J Linn Soc*, 133, 463–472.

175 Kawano S, Azuma H, Ito M, Suzuki K (1999) Extrafloral nectaries and chemical signals of  
176 *Fallopia japonica* and *Fallopia sachalinensis* (*Polygonaceae*), and their roles as defense systems  
177 against insect herbivory. *Plant Spec Biol* 14:167–178

178 Krebs C, Mahy G, Matthies D, Schaffner U, Tiebre M-S, Bizoux J-P (2010). Taxa distribution  
179 and RAPD markers indicate different origin and regional differentiation of hybrids in the  
180 invasive *Fallopia* complex in central-western Europe. *Plant Biol*, 12(1), 215–223.

- 181 Keane R, Crawley M (2002) Exotic plant invasions and the enemy release hypothesis. Trends  
182 Ecol Evol. 17: 164–170.
- 183 Laznik, Z., & Trdan, S. (2017). Occurrence of the Common Amber snail *Succinea Putris* (L.)  
184 (Gastropoda: Styllomatophora) on Japanese Knotweed (*Fallopia Japonica* [Houtt.] Ronse  
185 Decraene) in Slovenia-Possible weed biocontrol agent? Sustainable Agriculture Research,  
186 6(526-2017-2667).
- 187 Maurel N, Fujiyoshi M, Muratet A, Porcher E, Motard E, Gargominy O, Machon N (2013)  
188 Biogeographic comparisons of herbivore attack, growth and impact of Japanese knotweed  
189 between Japan and France. J Ecol 101: 118–127.
- 190 Moorhouse ER, Charnley AK, Gyllespie AT (1992) A review of the biology and control of the  
191 vine weevil, *Otiorhynchus sulcatus* (Coleoptera: Curculionidae). Ann Appl Biol 121: 431-454.
- 192 Rouifed S, Piola F, Spiegelberger T (2014) Invasion by *Fallopia* spp. in a French upland region  
193 is related to anthropogenic disturbances. Basic Appl Ecol 15: 435–44.
- 194 Shaw, R. H., Bryner, S., & Tanner, R. (2009). The life history and host range of the Japanese  
195 knotweed psyllid, *Aphalara itadori* Shinji: potentially the first classical biological weed control  
196 agent for the European Union. Biological control, 49(2), 105-113.
- 197 Smith F F (1932) Biology and control of the black vine weevil (No. 325). US Department of  
198 Agriculture.
- 199 Son Y, Lewis EE (2005) Effects of temperature on the reproductive life history of the black  
200 vine weevil, *Otiorhynchus sulcatus*. Entomol Exp Appl 114(1): 15-24.
- 201 Tiébré M-S, Bizoux J-P, Hardy OJ, Bailey JP, Mahy G (2007). Hybridization and  
202 morphogenetic variation in the invasive alien *Fallopia* (Polygonaceae) complex in Belgium.  
203 Amer J Bot, 94(11), 1900–1910.
- 204
- 205 Van Tol, R. W. H. M., Van Dijk, N., & Sabelis, M. W. (2004). Host plant preference and  
206 performance of the vine weevil *Otiorhynchus sulcatus*. Agricultural and Forest Entomology,  
207 6(4), 267-278.

- 208 Wang, Y., Wilson, J. R., Zhang, J., Zhang, J., & Ding, J. (2010 a). Potential impact and non-  
209 target effects of *Gallerucida bifasciata* (Coleoptera: Chrysomelidae), a candidate biological  
210 control agent for *Fallopia japonica*. *Biological Control*, 53(3), 319-324.
- 211 Wang, Y., Wu, K., & Ding, J. (2010 b). Host specificity of *Euops chinesis*, a potential  
212 biological control agent of *Fallopia japonica*, an invasive plant in Europe and North America.  
213 *BioControl*, 55(4), 551-559.



## Tables

**Table 1** Characteristics of leaves used for the experiment ‘One night, one choice’. Insects found in the experimental greenhouse of the Campus La Doua (Villeurbanne, France) are named ‘F-pop’, whereas the ‘N-pop’ represents the naïve insects collected close to Vienne (~30km of Lyon, without any *Fallopia* around), reared on *Fragaria* or *Fallopia*.

|                                                 | F-pop on<br><i>Fallopia</i> | N-pop on<br><i>Fragaria</i> | N-pop on<br><i>Fallopia</i> |
|-------------------------------------------------|-----------------------------|-----------------------------|-----------------------------|
| N                                               | 5                           | 18                          | 18                          |
| <i>Fallopia</i> leaf area (cm <sup>2</sup> )    | 12.16 ± 1.54                | 4.57 ± 0.15                 | 7.81 ± 0.73                 |
| <i>Fragaria</i> leaf area (cm <sup>2</sup> )    | 11.38 ± 1.48                | 4.24 ± 0.15                 | 7.36 ± 0.67                 |
| <i>Fall.</i> eaten leaf area (cm <sup>2</sup> ) | 0.89 ± 0.25a                | 0.65 ± 0.15a                | 0.64 ± 0.16a                |
| <i>Frag.</i> eaten leaf area (cm <sup>2</sup> ) | 0.16 ± 0.16a                | 0.34 ± 0.07a                | 1.04 ± 0.18b                |
| Total eaten leaf area (cm <sup>2</sup> )        | 1.05 ± 0.13a,b              | 0.99 ± 0.13b                | 1.70 ± 0.17a                |

## Figures

**Fig.1** Picture of a Black vine weevil eating a Fallopia leaf. (© L. TEULIER)

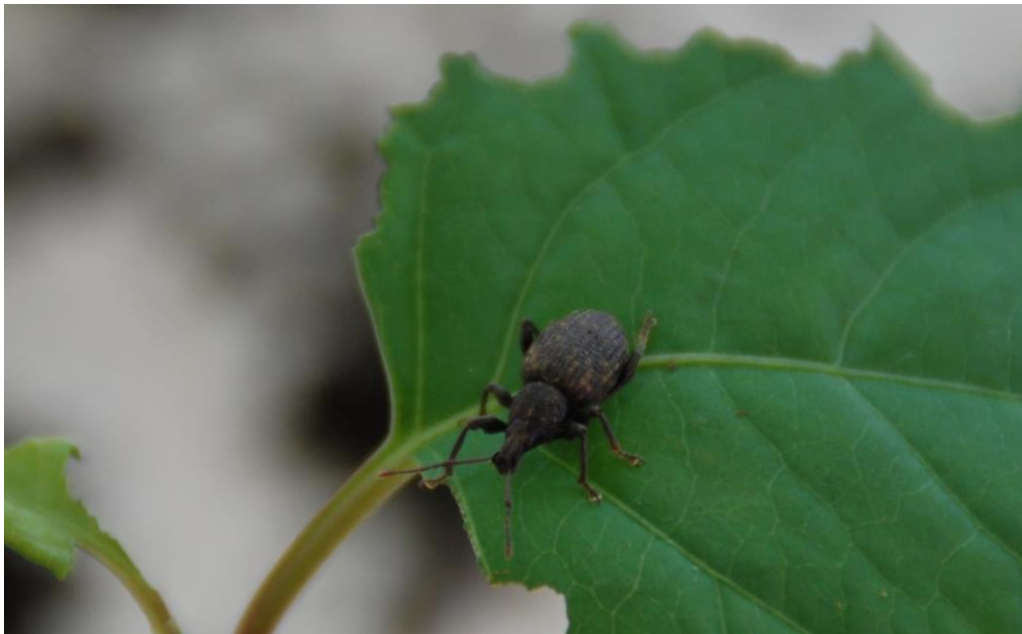

**Fig. 2** Percentage of *Fallopia* (grey) or *Fragaria* (white) leaf area eaten by black vine weevils during one night. Each insect was able to choose between the same leaf area (3-10 cm<sup>2</sup>) of Japanese knotweed and strawberry. F-pop on *Fallopia* (n=5) means for the weevils coming from the experimental greenhouse, found in *Fallopia* pots, N-pop on *Fragaria* (n=18) and N-pop on *Fallopia* correspond to naïve weevils sampled in the commercial greenhouse, without Japanese knotweed and reared on *Fallopia* or on *Fragaria*, respectively. For more details, please refer to Materials and Methods section.

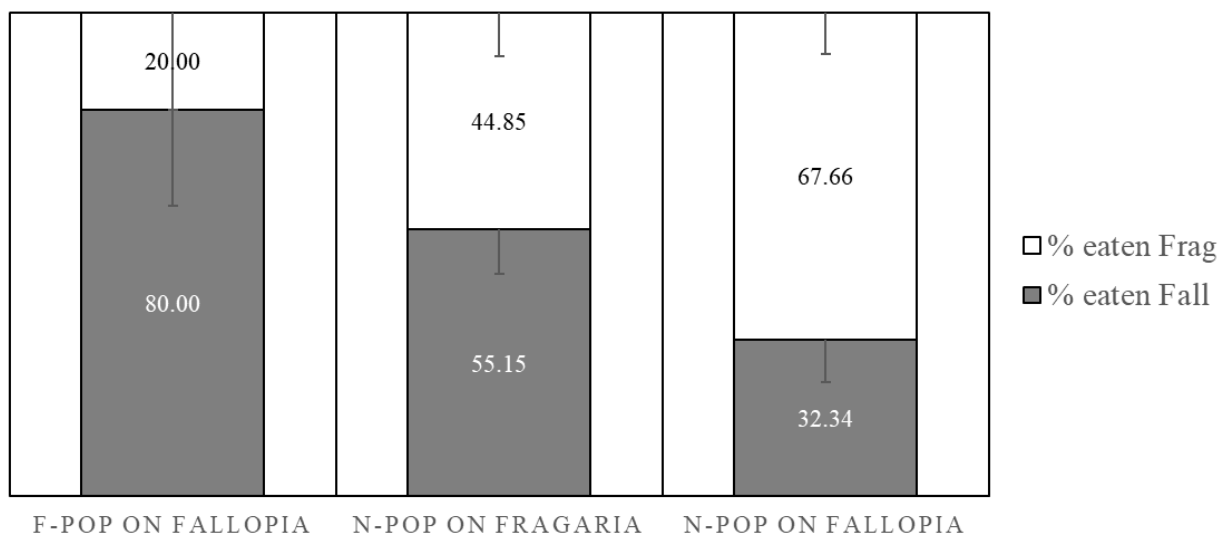

**Fig. 3** Series of pictures showing the evolution of 5 *Fallopia* pots in presence of 3 black wine weevil adults. They ate all the leaves in ~25 days.

| Date                  | UTE 1                                                                               | UTE 2                                                                               | UTE 3                                                                               | UTE 4                                                                                | UTE 5                                                                                 |
|-----------------------|-------------------------------------------------------------------------------------|-------------------------------------------------------------------------------------|-------------------------------------------------------------------------------------|--------------------------------------------------------------------------------------|---------------------------------------------------------------------------------------|
| Day 1<br>01/04/19     |    |    |    |    |    |
| Day 5<br>05/04/19     |    |    |    |    |    |
| Day 10<br>10/04/19    |   |   |   |   |   |
| Day 15<br>15/04/19    |  |  |  |  |  |
| Day 19<br>19/04/19    |  |  |  |  |  |
| Day 25<br>25/04/19    |  |  |                                                                                     |  |                                                                                       |
| Day 29<br>29/04/19    |  |  |                                                                                     |                                                                                      |                                                                                       |
| <b>Total duration</b> | <b>28 days</b>                                                                      | <b>28 days</b>                                                                      | <b>22 days</b>                                                                      | <b>24 days</b>                                                                       | <b>22 days</b>                                                                        |
